# Supplementary material for: Neuronal APOE4 removal protects against tau-mediated gliosis, neurodegeneration and myelin deficits
Source: PubMed Central journal article supplement (PMC10154214; doi:10.1038/s43587-023-00368-3), 2023-02-20

Figure 1

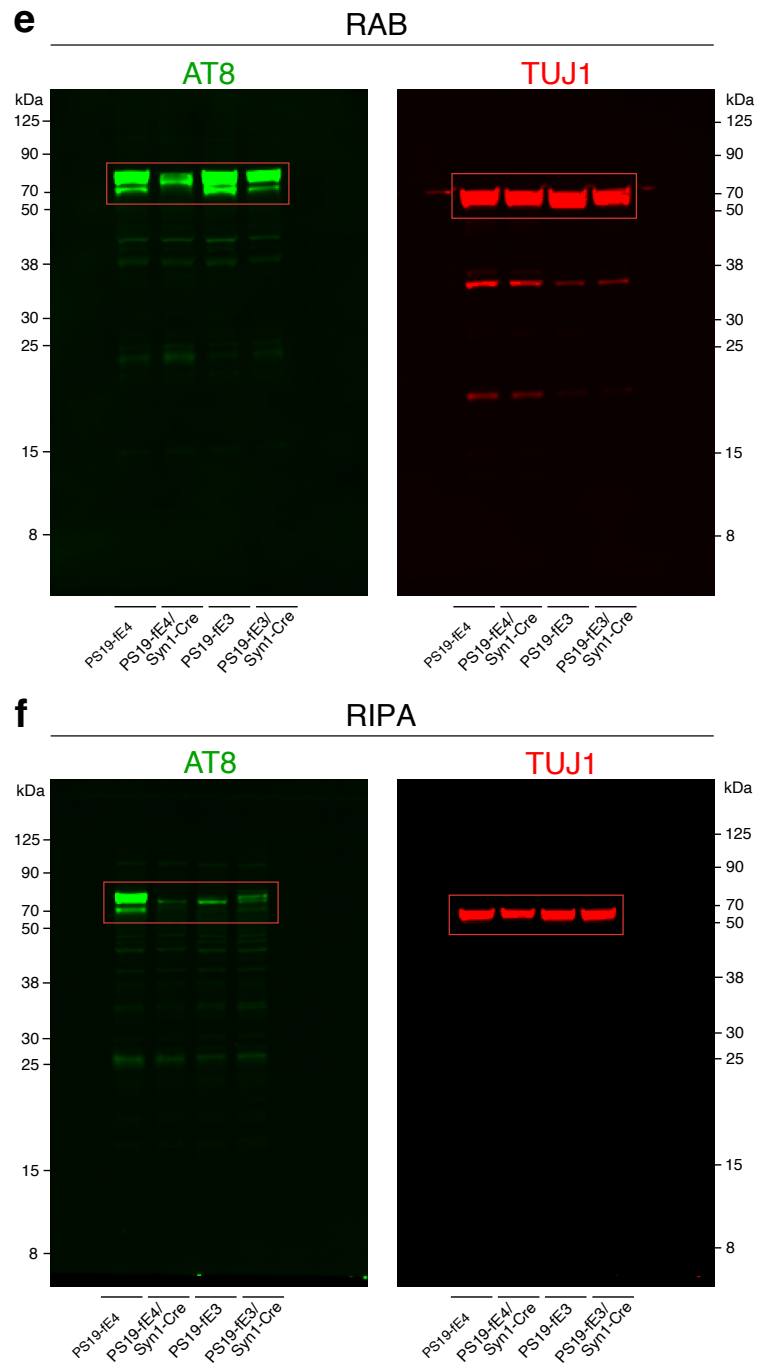

Supplement: 43587_2023_368_MOESM10_ESM.pdf [file 43587_2023_368_MOESM10_ESM.pdf]
